# Supplementary material
Source: PubMed Central journal article supplement (PMC3660186)

# Supplemental data 1

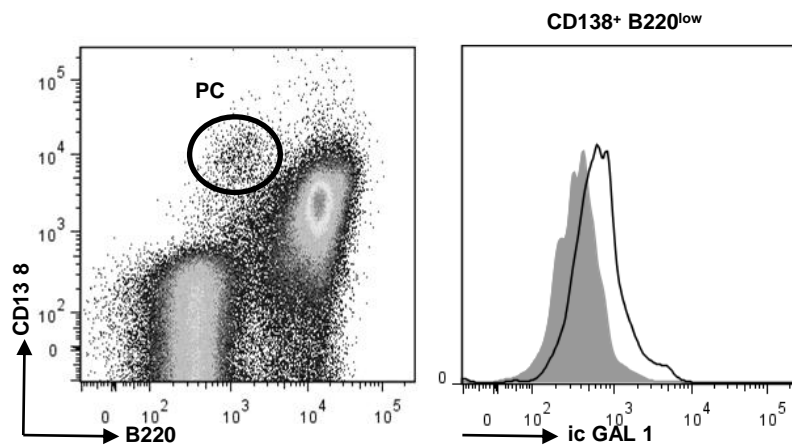

Supplemental data 2

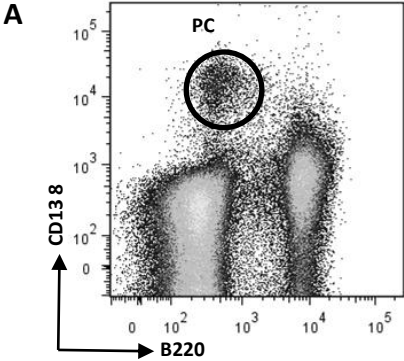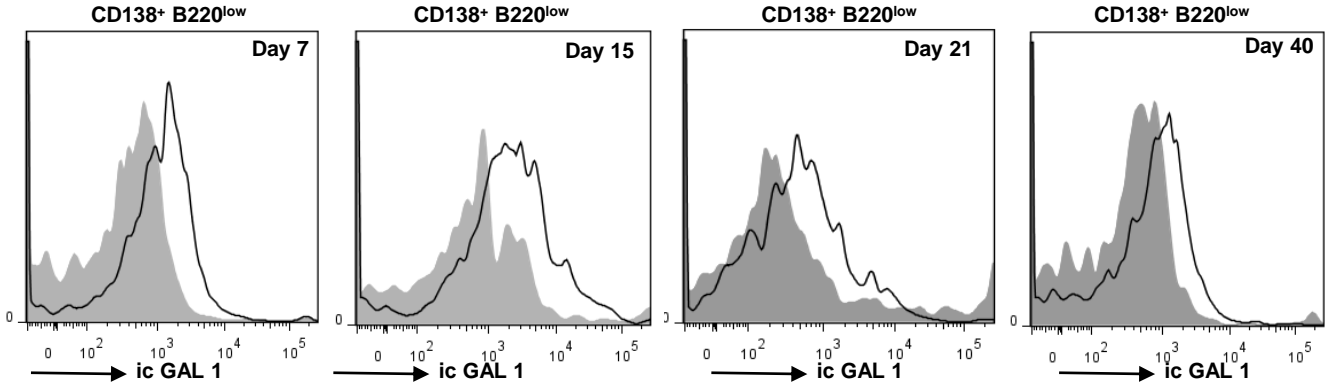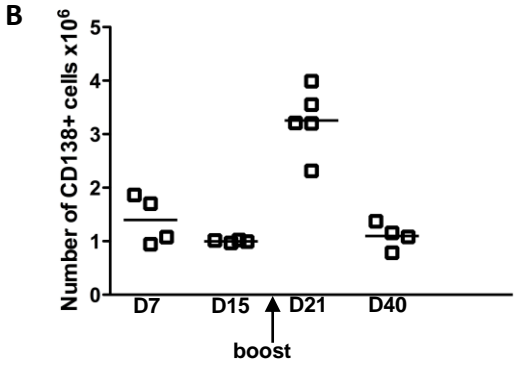

# Supplemental data 3

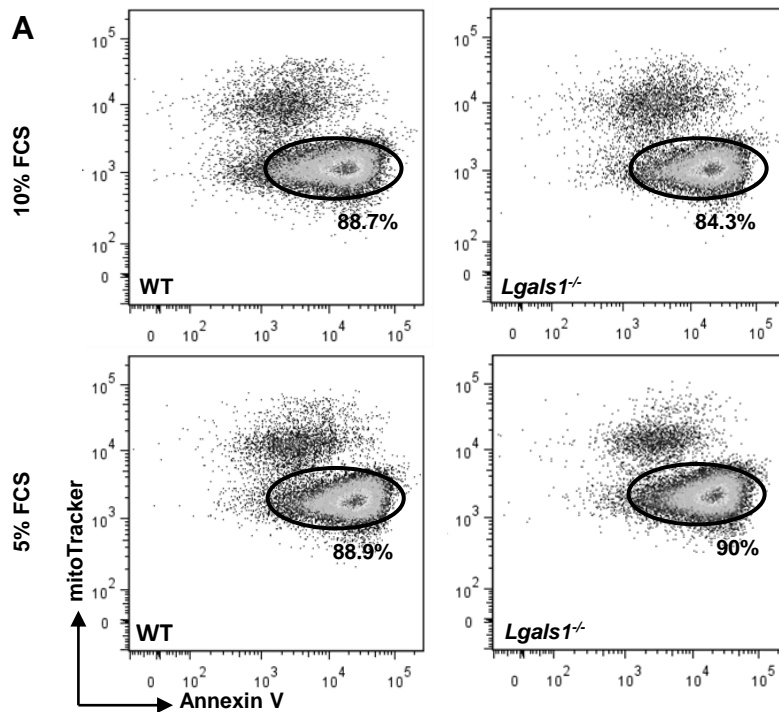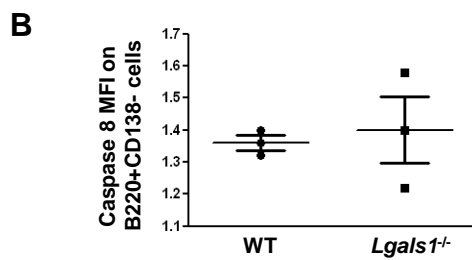

Supplement: NIHMS52634-supplement-1.pdf [file NIHMS52634-supplement-1.pdf]
